# Supplementary material for: Establishment of a PCR Assay for the Detection and Discrimination of Authentic Cordyceps and Adulterant Species in Food and Herbal Medicines
Source: PubMed Central journal article supplement (PMC6222412; doi:10.3390/molecules23081932), 2018-08-02
Supplement: molecules-23-01932-s001.pdf [file molecules-23-01932-s001.pdf]

# Establishment of a PCR Assay for the Detection and Discrimination of Authentic Cordyceps and Adulterant Species in Food and Herbal Medicines

Byeong Cheol Moon <sup>1,\*</sup>, Wook Jin Kim <sup>1</sup>, Inkyu Park <sup>1</sup>, Gi-Ho Sung <sup>2,3</sup> and Pureum Noh <sup>1</sup>

\* Correspondence: bcmoon@kiom.re.kr; Tel.: +82-42-868-9530

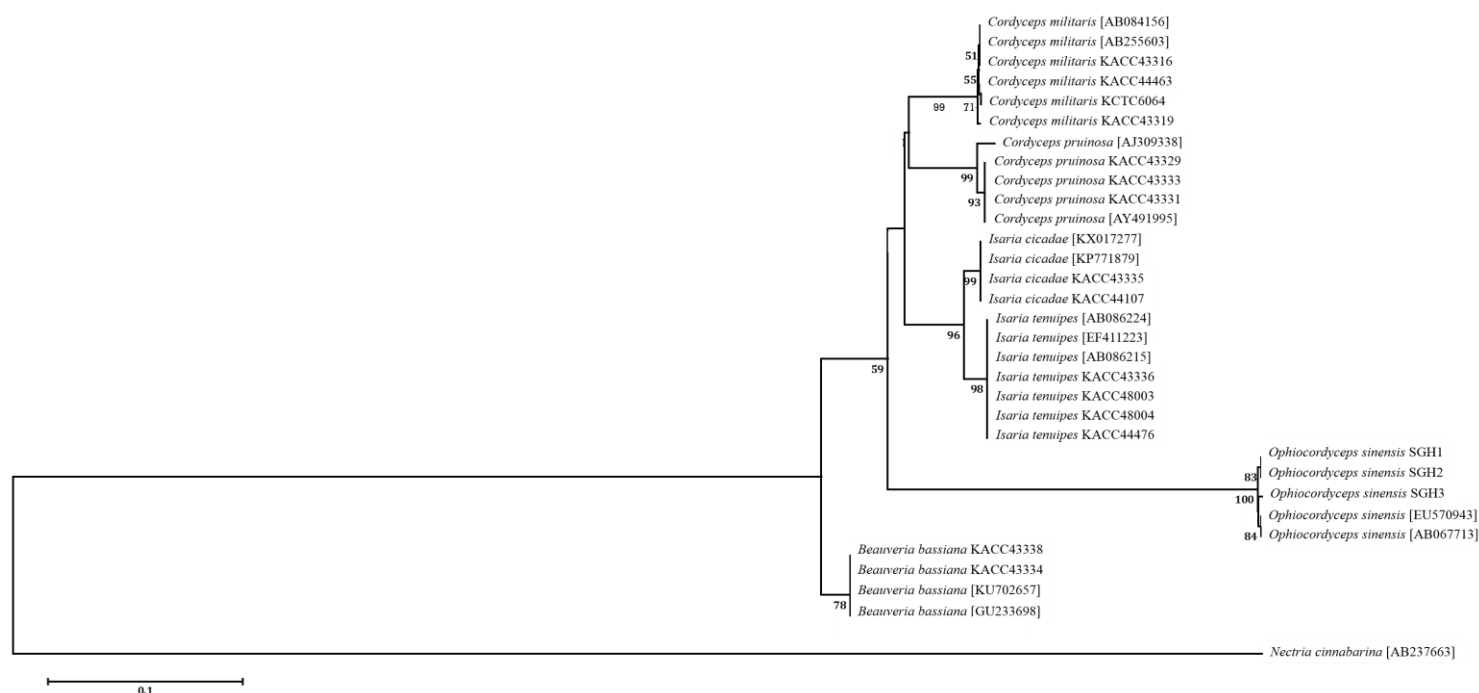

**Figure S1.** Phylogenetic relationships between six fungal species (Cordyceps and related species, and a closely related medicinal fungus) based on their nrDNA-ITS sequences. Numbers at the nodes are the bootstrap values from 1000 replicates. The nrDNA-ITS sequence of *Nectria cinnabarina* (AB237663) was used as an outgroup.

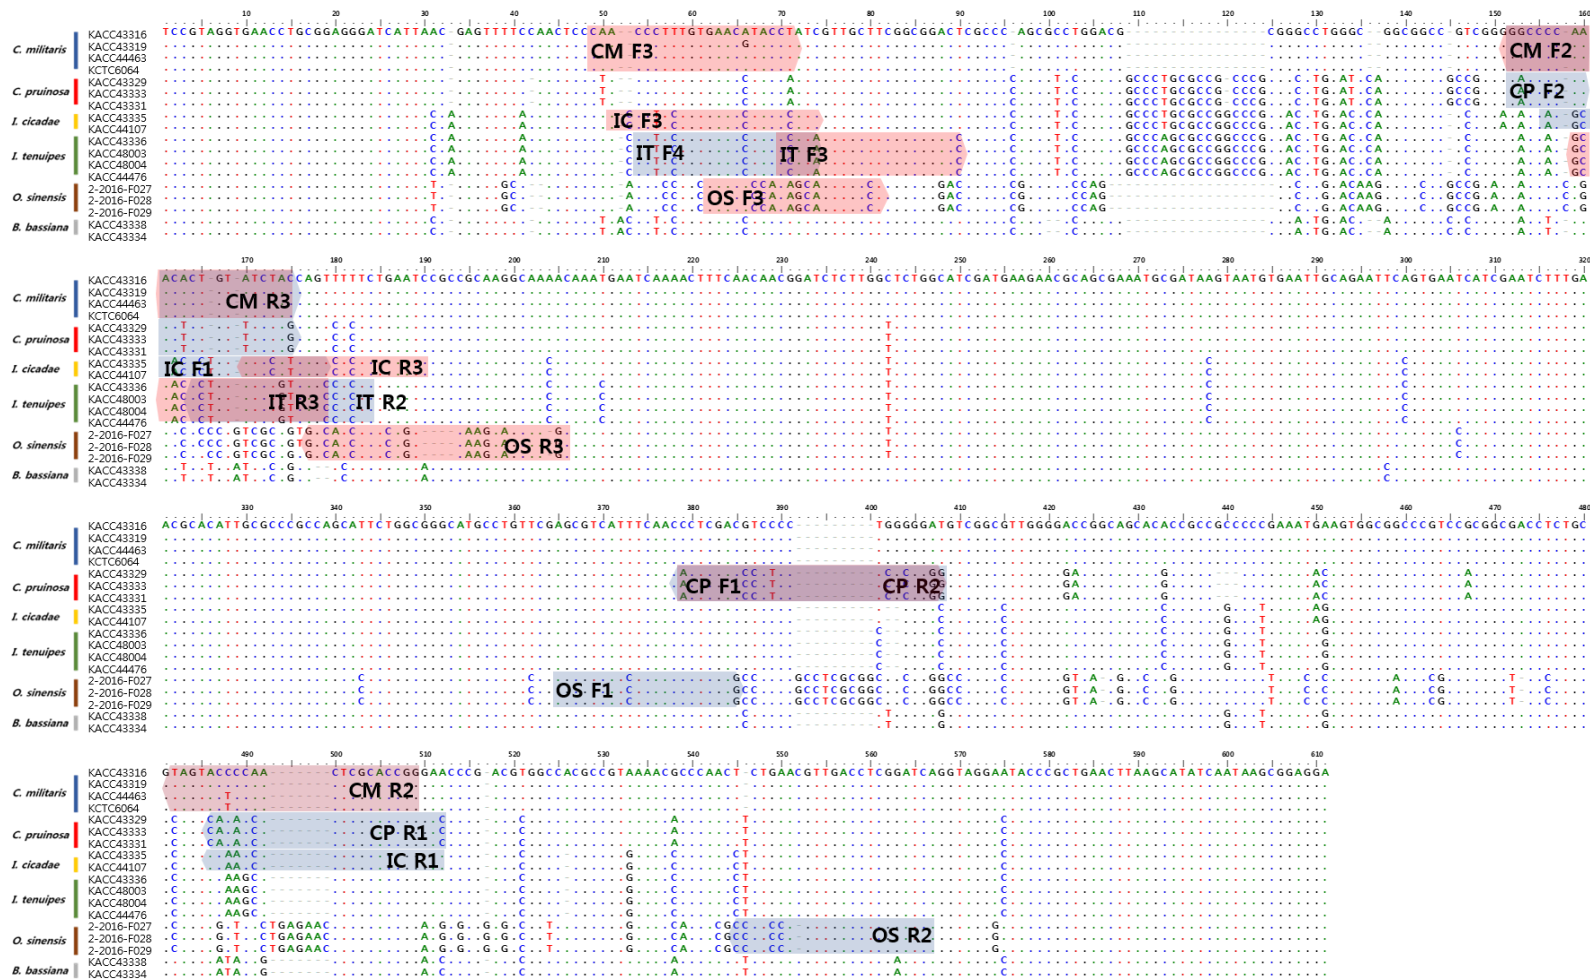

**Figure S2.** Comparison of nrDNA-ITS sequences and positions of species-specific primers for the development of SCAR markers. Sequences were aligned using the ClustalW alignment tool of the BioEdit program (version 7.2.6). The arrow boxes indicate primer sequences and their polarities. The primer names are given in the boxes. Dots (.) and dashes (-) indicate identical nucleotides and gaps, respectively, when compared with *C. militaris* KACC 43316, to maximize sequence alignment presentation.

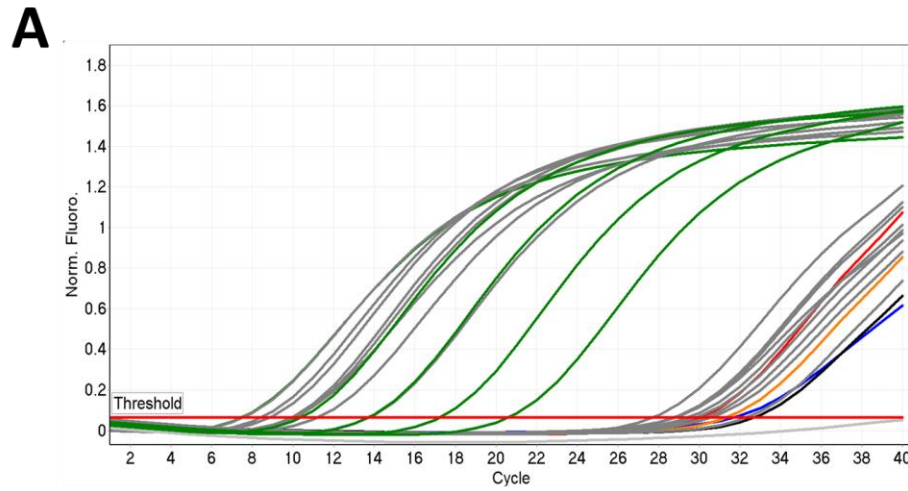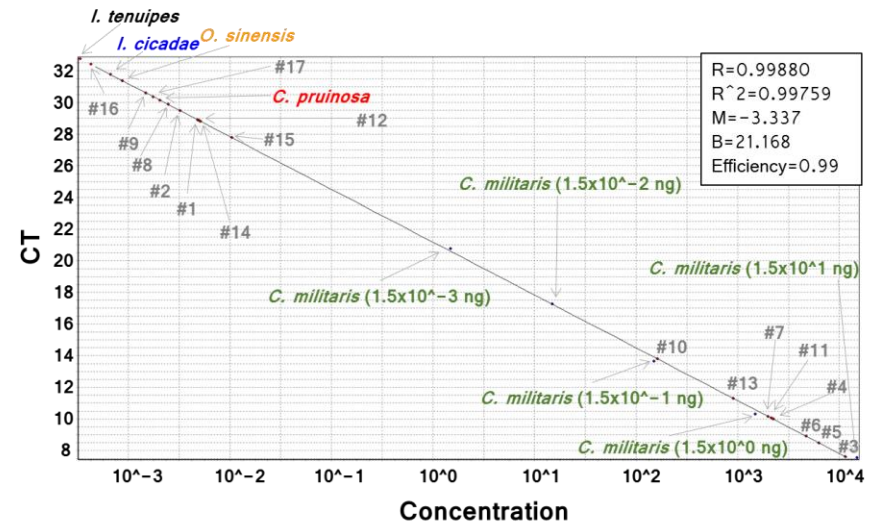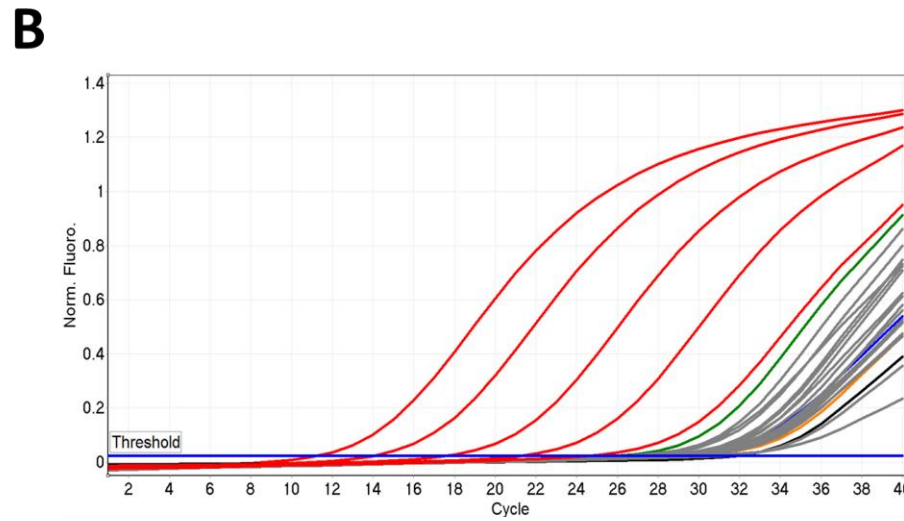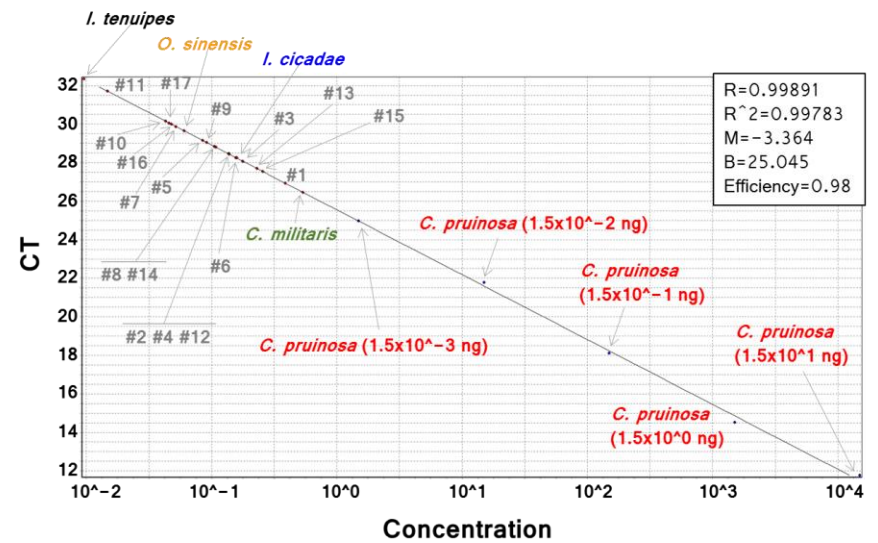

C

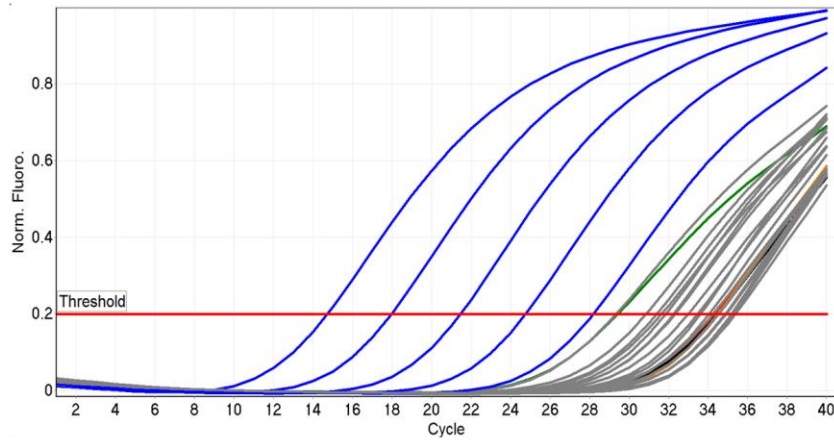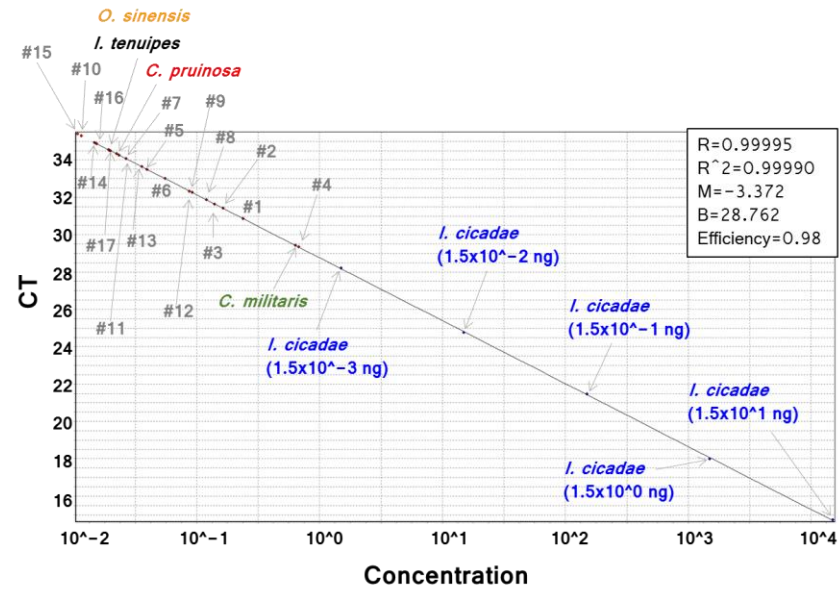

D

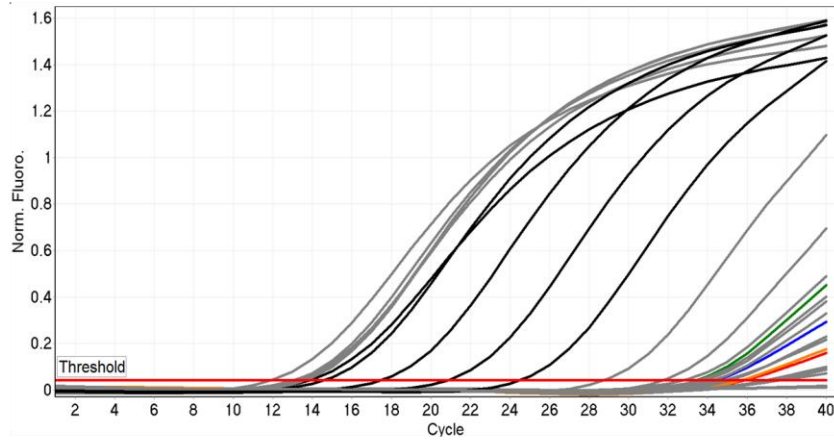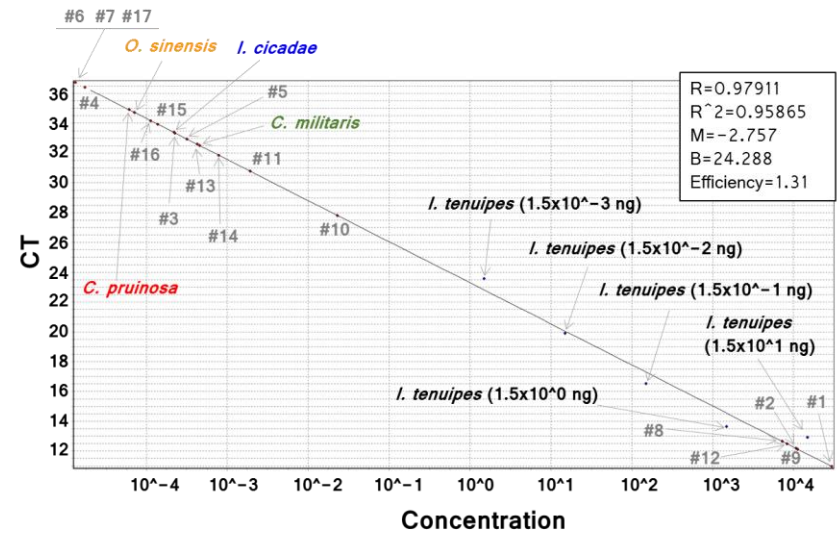



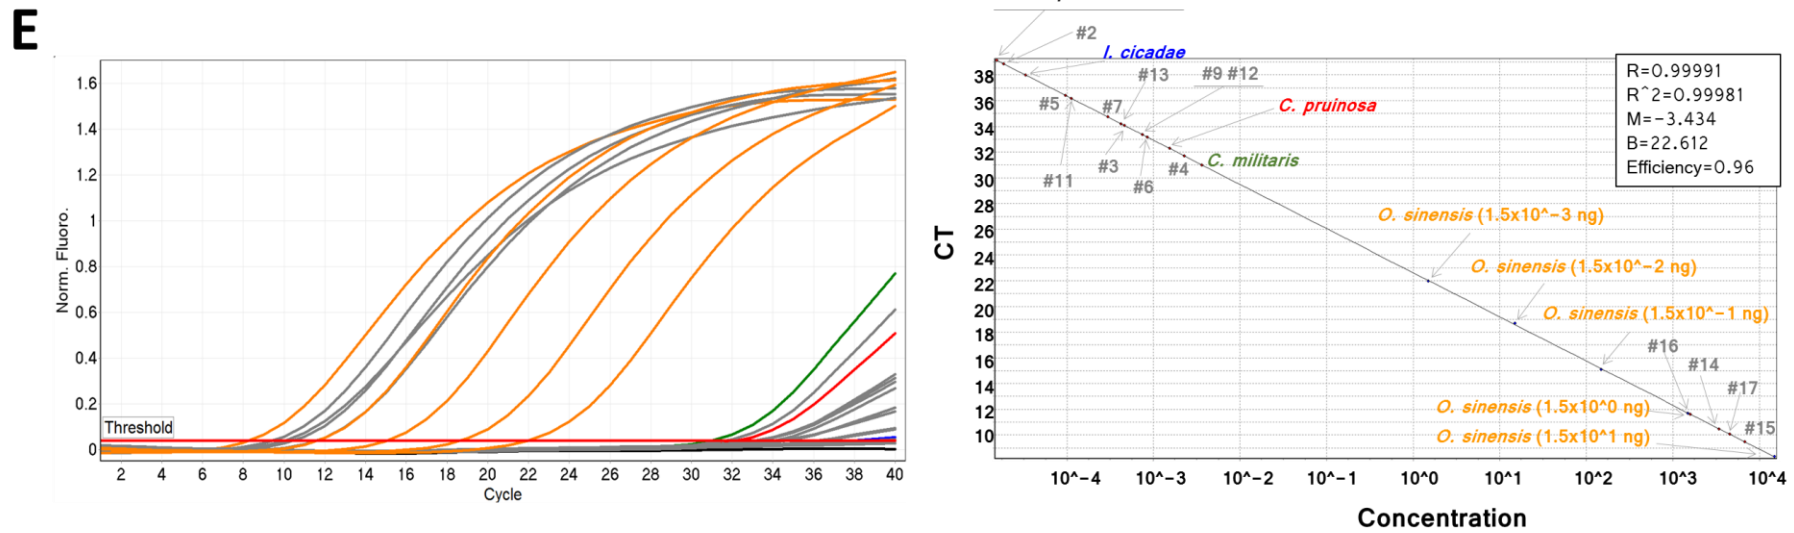

**Figure S3.** Establishment of the real-time PCR assay for distinguishing Cordyceps and the related species, and the results from real-time PCR assays of commercial products. (A) *C. militaris*, (B) *C. pruinosa*, (C) *I. cicadae*, (D) *I. tenuipes*, and (E) *O. sinensis*. Right panels: Real-time PCR data for five serial dilutions of the control genomic DNA template (15 ng, 1.5 ng, 150 pg, 15 pg, and 1.5 pg) and commercial products. Left panels: Quantification data for five serial dilutions of the control genomic DNA and commercial product templates.



C

|                               | 10                 | 20                 | 30           |      |
|-------------------------------|--------------------|--------------------|--------------|------|
| C. pruinosa_CP F1             | CAAGACTCGA         | CCC                | CTCCTCGCGGGG | TCGG |
| O. sinensis 2-2016-F027       | ...C...G...        | CCCGC...           | ...CGGC...   |      |
| C. militaris_KACC43316        | ...C...GT...       | ...G.G...          | AT...        |      |
| I. cicadae_KACC43335          | ...C...GT...       | ...G...            | AC...        |      |
| I. tenuipes_KACC43336         | ...C...GT...       | ...CG...           | AC...        |      |
| B. bassiana_KACC43338         | ...C...T...        | ...T.G.A...        |              |      |
| O. acicularis_JN049820        | ...C...G.A...      | CG...GG            |              |      |
| O. agriotidis_AB968403        | ...C...GG...       | ...CTAG...         | CC.C...      |      |
| O. appendiculata_JN943325     | ...C...G...        | CCCC.AG.C.CG       | ...CGG...    |      |
| O. arborescens_AB968398       | ...C...G...        | CGGCT              |              |      |
| O. australis_KF937349         | CT.TA.T.TA         | TTAATATTAAGTATA    | T.TT.GA.A    |      |
| O. clavata_JN943327           | ...G...GG.G...     | CC...C.A...        | CC.C...      |      |
| O. coccidiicola_AB968404      | ...C...G...        | CGCCTCGG           |              |      |
| O. coenomyia_AB968396         | ...G...C...G...    | ...C...C...        | ...C...      |      |
| O. communis_GU723768          | ...C...CG...GT     | ...C.TC.AG...      | ...CC...     |      |
| C. dipterigena_AY245629       | A.C...TA.G...C     | TGT.G...TAG        | ...CC...     |      |
| C. entomorrhiza_AJ786560      | ...G...C...GG...   | ...C...CTCGC...    | ...CC...     |      |
| O. ferruginosa_AB968405       | ...C...AGG...      | CCGCGAC...CA...TC  | CC...        |      |
| O. gracilis_HM142942          | ...G...C...G...    | ...C...CA...       | ...C...      |      |
| O. heteropoda_FJ765027        | ...C...G...G...    | ...C...C.G...C...  | ...CC...     |      |
| O. irangiensis_AY646400       | ...G...AA.GA       | GCTATATGG...T.TC   | T.TT.GA...   |      |
| O. lloydii_KP200892           | T.CCTG.TG          | TG...CGGTGAT...    | C.CG...T     |      |
| O. longissimi_AB968406        | ...T.C...G...      | GCCGCGCG.C         | CTCCTCC.CC   |      |
| O. macroacicularis_KR005829   | ...C...G...        | CCCTC.G...C.CG     | ...CGGC...   |      |
| O. myrmecophila_MH028143      | ...CT...A.CA       | G.AGTCTA           | T.TT.GA.C    |      |
| O. nigrella_JN049853          | ...G...C...G...    | ...CCGCG...        |              |      |
| O. nutans_AB176463            | ...A.G.ATTTATACCT  | GTATAGT.TT         | GA.A         |      |
| O. rhizoidea_GU723769         | ...C...G...        | CGGCT.GG           |              |      |
| C. robertsii_AJ309335         | ...C...G...        | CCCTC.GG.C.CG      | ...CGGT...   |      |
| O. rubiginosiperithecata_JN94 | ...C...G...        | ...C...C...        | ...C...      |      |
| O. sobolifera_AB968409        | ...T...C...G...    | CG.GAG.C.C         | ...C...      |      |
| O. sphecocephala_JN943350     | ...GT...A.GG       | TGCTATAGTAGGGT     | TT.ATAGTAA   |      |
| O. stylophora_JN049828        | ...C...G...        | CCCCA.C...C.CG     |              |      |
| C. tricentri_AJ309364         | ...GT...AA.GA      | ACTATATGTG...      | TT-TATT.GA.A |      |
| O. unilateralis_GU723756      | ...C...GG.G...     | GCGCCG...C.CGTC    | CGG...       |      |
| O. xuefengensis_KY429942      | ...C...G...        | CCGC...CG.CA       | CCTCC...     |      |
| C. tuberculata_GQ250005       | ...C...G...        | ...C.G.G...        | ...CC...     |      |
| C. spgazzinii_HQ248195        | ...C...GT...       | ...C...CG...       | ...AT...     |      |
| C. scarabaeicola_AY245639     | ...C...TT...       | ...C.T.TAG...      | ...A...      |      |
| C. roseostromata_AY245637     | ...C...G...        | ...G.G...          | ...AT...     |      |
| C. pseudomilitaris_JN943305   | ...C...G.T...      | ...C...T.G.A...    | ...CC...     |      |
| C. pleuricapitata_JN943304    | ...C...AGG...      | ...C...C.CG...     | ...CTT...    |      |
| C. ninchukispora_AY245642     | ...C...G...        | ...C...G...        | ...CC...     |      |
| C. memorabilis_JN116706       | ...C...T...        | CGGCTT.T.T         | ...AG...     |      |
| C. hawkesii_AJ309341          | ...C...AGG.A...    | CCCCCG...GGG       | CT.TGGC...   |      |
| C. gunnii_AJ309340            | ...C...AGGTA...    | CCCCCG...GGG       | CT.TGGC...   |      |
| C. fraticida_JQ349068         | ...C...A.G.G...    | TG.G.T.G           |              |      |
| C. cylindrica_GU980041        | ...G...C...GG.G... | CC...C...          | ...CC.C...   |      |
| C. coccidioperithecata_JN0498 | ...C...G...T...    | ...C.TC.G.A...     | ...CC...     |      |
| C. cardinalis_KF937320        | ...C...G...T...    | ...C...T.G.A...    | ...CC...     |      |
| C. brongniartii_AB100036      | ...C...G...T...    | ...C...T.T.G.AA... | ...AC...     |      |
| C. bifusispora_AY245627       | ...C...G...T...    | ...C...CG...       | ...AC...     |      |
| I. japonica_AF200370          | ...C...G...T...    | ...C...CG...       | ...AC...     |      |
| P. hepiali_HM135170           | ...C...G...T...    | ...C.T.T.G.AAA...  | ...AA...     |      |
| M. anisopliae_AB071711        | GC...A.GT...       | ...C.TGT...        | AC.T...      |      |

D

|                               | 10                       | 20              | 30        | 40             |
|-------------------------------|--------------------------|-----------------|-----------|----------------|
| C. pruinosa_CP R1             | CGGGTCCCG                | GTGCGAC         | TGGT      | GTCAGTGGCGAG   |
| O. sinensis 2-2016-F027       | ...C.C.TT.CG...          | ...G.GT.CT      | CAGT      | GA.CT...       |
| C. militaris_KACC43316        | ...T...G...              | ...T.G...       | GT...     | A...           |
| I. cicadae_KACC43335          | ...T...G...              | ...G...         | TGT       |                |
| I. tenuipes_KACC43336         | ...T...G...              | ...C...         | TGT       |                |
| B. bassiana_KACC43338         | ...T...G...              | CT...T          | A.T...    | A...           |
| O. acicularis_JN049820        | ...C.C...G.CGA...        | ...G.GT.CT      | CGGAGA    | CT...          |
| O. agriotidis_AB968403        | ...C.CGT...CG...         | ...G.GT.TC      | CGGGA     | CT...          |
| O. appendiculata_JN943325     | ...C.C...CG...           | ...G.GT.CT      | CAGG      | GA.CT...       |
| O. arborescens_AB968398       | ...C.C.TT.CG...          | ...G.GT.CT      | CTGG      | GA.CT...       |
| O. australis_KF937349         | ...CA...TTAAAAA...       | ...CTTCCAATTATG | ...T.TTAA | T...           |
| O. clavata_JN943327           | ...CCG...CG...           | ...G.C.T.C      |           |                |
| O. coccidiicola_AB968404      | ...CTC.TT.CG...          | ...G.GT.CT      | CTGG      | GA.CT...       |
| O. coenomyia_AB968396         | ...C.C...T.CA...         | ...C.CTGT       | ...CT...  | T...           |
| O. communis_GU723768          | ...CCT...CGTA...         | ...G.CGT.C      | ...T...   | T...           |
| C. dipterigena_AY245629       | ...A...C.G...G...        | CT.AACG         | AACT      | ...A...CT      |
| C. entomorrhiza_AJ786560      | ...C.C...T.CG...         | ...C.AAG        | CT        | ...C...        |
| O. ferruginosa_AB968405       | ...CC.CG...CG...         | ...GCTT.CC      | TAGCGCT   | ...T...C       |
| O. gracilis_HM142942          | ...C.C...T.CA...         | ...C.CTGT       | ...CT...  | T...           |
| O. heteropoda_FJ765027        | ...C.C...T.CG...         | ...G.GTGT       | ...G      | CT...A...      |
| O. irangiensis_AY646400       | T.CTAGT.TTCCAA           | TTGCAA.TAAA     | TCT       | ...TTA...      |
| O. lloydii_KP200892           | ...G.G.CCTCC...          | ...G            | ATCAGT    | ...G...        |
| O. longissimi_AB968406        | G.C.CC...CGA...          | ...GCGT         | T.CT      | ...C...        |
| O. macroacicularis_KR005829   | ...C.C.TT.CG...          | ...G.GT.CT      | CTGG      | GA.CT...       |
| O. myrmecophila_MH028143      | ...CC.A.TATAA...         | ...A.TGCAA      | TAGT      | ...T...TTA...A |
| O. nigrella_JN049853          | -----Noninformation----- |                 |           |                |
| O. nutans_AB176463            | ...CGA.TTCT...           | ...ATTGTA.C.TT  | ...T...   | CTA...A        |
| O. rhizoidea_GU723769         | ...C.C...TC...           | ...G            | C.AA      | TCT...G        |
| C. robertsii_AJ309335         | ...C.C.TT.CG...          | ...G.GT.CT      | CTGG      | GA.CT...       |
| O. rubiginosiperithecata_JN94 | ...C.C...G.CG...         | ...G.GT.CT      | CAGG      | GA.CT...       |
| O. sobolifera_AB968409        | ...C.CC...CGA...         | ...GCGT         | TC.T      | ...T...        |
| O. sphecocephala_JN943350     | T.CTAAAT.TCCA            | ATGGCGA.TAAAA   | GTCT      | ...TGT...      |
| O. stylophora_JN049828        | ...C.C...G.CG...         | ...G.GT.CT      | CTGG      | GA.CT...       |
| C. tricentri_AJ309364         | ...CTAAAT.TTCCA          | TTGTGAAT.AT     | ...T...   | T...A...A      |
| O. unilateralis_GU723756      | ...CCCGT...CGTC...       | ...GA           | GGTCGT    | ...G...        |
| O. xuefengensis_KY429942      | ...C.C.TT.CG...          | ...G.GT.CT      | CTGG      | GA.CT...       |
| C. tuberculata_GQ250005       | ...T.TT.A...             | ...G            | T.G       | T...CT         |
| C. spgazzinii_HQ248195        | ...T...T...A...          | ...G            | T.G       | AGT...         |
| C. scarabaeicola_AY245639     | ...T...T...              | ...G            | T.G       | A.T...A...     |
| C. roseostromata_AY245637     | ...T...T...              | ...G            | T.G       | GT...A...      |
| C. pseudomilitaris_JN943305   | ...T...T...              | ...G            | GT.AT     | G...T...A...   |
| C. pleuricapitata_JN943304    | ...C.C.T...CGA...        | ...G.GT.CT      | CGTG      | CT.CT...       |
| C. ninchukispora_AY245642     | ...TG...                 | ...G            |           | ...C...        |
| C. memorabilis_JN116706       | ...CT...GC...            | ...G            | GT.ATTT   | ACT...A...     |
| C. hawkesii_AJ309341          | ...C...T...              | ...G            | GT.TGT    | CT...A...      |
| C. gunnii_AJ309340            | ...C...T...              | ...G            | GT.TGT    | CT...A...      |
| C. fraticida_JQ349068         | ...C.C...T.GT...         | ...G            | GT.GTAT   | ...T...A...A   |
| C. cylindrica_GU980041        | ...C.CCT...CG...         | ...G            | GT.T.CT   | ...T...        |
| C. coccidioperithecata_JN0498 | ...T...T...              | ...G            | T.G       | ACT...         |
| C. cardinalis_KF937320        | ...TCT...A...            | ...G            | GC.A      | T...CT...A...  |
| C. brongniartii_AB100036      | ...T...T...              | ...G            | T.G       | A.T...A...     |
| C. bifusispora_AY245627       | ...T...T...              | ...G            |           | TGT...         |
| I. japonica_AF200370          | ...T...T...              | ...G            | ...C...   | TGT...         |
| P. hepiali_HM135170           | ...T...T...              | ...G            | T.G       | A.T...A...     |
| M. anisopliae_AB071711        | ...C...T...T...          | ...G            | T.CTTT    | ACT...         |



E

|                                |         |                                 |             |            |    |
|--------------------------------|---------|---------------------------------|-------------|------------|----|
|                                | 10      | 20                              | 30          | 40         | 50 |
| I. cicadae IC F3               | ACTCCCA | A CCCTTCTGTGAACC                | TACGC AT    | CTTGCTTCGG |    |
| O. sinensis 2-2016-F027        | CTC...  | A...CCTG C...A CC...AGCA        | .....C...   |            |    |
| C. militaris KACC43316         | .....   | C.T...A...CT                    | .....       |            |    |
| C. pruinosa KACC43329          | CTC..T. | ...C.T.....CA                   | .....       |            |    |
| I. tenuipes KACC43336          | .....   | .....C...                       | A.....      |            |    |
| B. bassiana KACC43338          | CTC..T. | .....CT                         | .....       |            |    |
| O. acicularis JN049820         | .ACT..C | A...CCTG C...G...CACTG.A        | .....C...   |            |    |
| O. agriotidis AB968403         | G.....  | A...CCTG C...T...C C ACG        | .....C...   |            |    |
| O. appendiculata JN943325      | CTC..G. | A...CCTG C...C...CAC            | .....C...   |            |    |
| O. arborescens AB968398        | .....   | A...CCTG...T...CACAG            | .....C...   |            |    |
| O. australis KF937349          | ....T.C | TAA.CCT.....TT A.TATCTT.A       | TTAC.....   |            |    |
| O. clavata JN943327            | CTC..AC | C...CGTG C...G.GAC.CCCGGAAG     | .....C...   |            |    |
| O. coccidiicola AB968404       | .....   | A...CC...C...G...CAC ACA        | .....C...   |            |    |
| O. coenomyia AB968396          | .....   | GA...CCTG C...G...CGCG          | .....C...   |            |    |
| O. communis GU723768           | .....   | A...CA.....TACAGC G             | .....C...   |            |    |
| C. dipterigena AY245629        | .....   | GA.AA.CCA.....A...C ATAC        | .....C...   |            |    |
| C. entomorrhiza AJ786560       | .....   | A...CA...CC.....T...C           | .....       |            |    |
| O. ferruginosa AB968405        | .....   | A...CC...A.AG...A A...C CTAC    | TA.....C... |            |    |
| O. gracilis HM142942           | .....   | AA...CA...C...G...C CAGC        | .....C...   |            |    |
| O. heteropoda FJ765027         | .....   | A...ACTG...T...CTCA             | .....C...   |            |    |
| O. irangiensis AY646400        | .....   | T...AA...CA.....CA...CTATA      | TA.....C... |            |    |
| O. lloydii KP200892            | .....   | Noinformation                   |             |            |    |
| O. longissimi AB968406         | .....   | GA...CC.....A T...CACA C        | .....C...   |            |    |
| O. macroacicularis KR005829    | .....   | A...CCTG C...T...CAC ACG        | .....C...   |            |    |
| O. macrocephala MH028143       | ..G.GGG | A.T...C.GA.ACC...GT.AACCTACCTAT | .....C...   |            |    |
| O. nigrella JN049853           | .....   | A...CG.G C.C...GC.TA.CGTC       | .....C...   |            |    |
| O. nutans AB176463             | ....T.C | AATTC.....A.GTATAT...TTTC       | C...C...    |            |    |
| O. rhizoidea GU723769          | .....   | A...ACTG...A...CCCAAG           | .....C...   |            |    |
| C. robertsii AJ309335          | CTC...  | A...CCTG...C...CTCAC            | .....C...   |            |    |
| O. rubiginosiperitheciata JN94 | .....   | A...CGTG...G...CTC G            | .....C...   |            |    |
| O. sobolifera AB968409         | .....   | A...CC...T...CGCAAC             | .....C...   |            |    |
| O. sphecocephala JN943350      | .....   | T...AA...CA.....A...CTATA       | TC...C...   |            |    |
| O. stylophora JN049828         | .....   | A...CCTG...G...C CAGC           | .....C...   |            |    |
| C. tricentri AJ309364          | .TCT..C | AA...CA.....T G.C.CTAT          | F.....C...  |            |    |
| O. unilateralis GU723756       | ..G...A | A...CA.GAGA.C...CGTCGGA AACGA   | .....C...   |            |    |
| O. xuefengensis KY429942       | .....   | A...CC...C...A...CAC ACG        | .....C...   |            |    |
| C. tuberculata GQ250005        | .....   | A...C.G...A...C G               | .....       |            |    |
| C. spegazzinii HQ248195        | .....   | .....A...CT...A                 | .....       |            |    |
| C. scarabaeicola AY245639      | CTC..A. | .....CT...C T                   | .....       |            |    |
| C. roseostromata AY245637      | .....   | ...C.T.....G...CT               | .....       |            |    |
| C. pseudomilitaris JN943305    | .....   | A...AAA.....A...CTC TC A        | .....       |            |    |
| C. pleuricapitata JN943304     | .....   | A...CCTGTGA.C.G...C G           | .....C...   |            |    |
| C. cinchukispora AY245642      | CTC..T. | ...C.T...CA C                   | .....       |            |    |
| C. memorabilis JN116706        | .....   | A...C.G...AA...A...TTA C T      | .....       |            |    |
| C. hawkesii AJ309341           | .....   | A...C.G...AACTTA...CTATA C T    | .....A...   |            |    |
| C. gunnii AJ309340             | .....   | A...C.G...AACTTA...CTATA C T    | .....       |            |    |
| C. fraticida JQ349068          | .....   | A...C.G...AACTTA...CAC A        | .....       |            |    |
| C. cylindrica GU980041         | .....   | A...CCTGAC...G...CAC A          | .....C...   |            |    |
| C. coccidioperitheciata JN0498 | T.C.TT. | ...C.TCTGTG.A...CT C            | .....       |            |    |
| C. cardinalis KF937320         | .....   | A...AAA.....A...CT TC A         | .....       |            |    |
| C. brongniartii AB100036       | CTC..T. | .....A.....CT TC A              | .....       |            |    |
| C. bifusispora AY245627        | .....   | .....A...C...                   | .....       |            |    |
| I. japonica AF200370           | .....   | .....C...A                      | .....       |            |    |
| P. hepiali HM135170            | .....   | A...T...A...CT                  | .....       |            |    |
| M. anisopliae AB071711         | .....   | ...C.G...AA TTA...CTTTA...T     | .....       |            |    |

F

|                                |                 |                                             |    |    |
|--------------------------------|-----------------|---------------------------------------------|----|----|
|                                | 10              | 20                                          | 30 | 40 |
| I. cicadae IC R3               | TTGGGGCGATTGAGA | GAGACTGATG GATACAGGGTTGGTG                  |    |    |
| O. sinensis 2-2016-F027        | .GTTCTT..C      | G AGA..TG.CAC..C.C.GG...G.CT.G              |    |    |
| C. militaris KACC43316         | .....           | A.A...G.A...T...TG.G                        |    |    |
| C. pruinosa KACC43329          | .....           | ...C.A...A...A...TG.G                       |    |    |
| I. tenuipes KACC43336          | .....           | .....G...CA                                 |    |    |
| B. bassiana KACC43338          | .....           | F.....A...TG...G A...A...A.TT..             |    |    |
| O. acicularis JN049820         | .....           | TGCTT..F.CG.C...GA..TG.C.C.AC.GF.G.A..CTT.G |    |    |
| O. agriotidis AB968403         | GCCT..C.AC.C    | GAT..T.CAC..AAG...AG.CT.G                   |    |    |
| O. appendiculata JN943325      | .....           | CTTT..C..G..G AGAA.TG.CAC..C.C.GGA.AG.C..G  |    |    |
| O. arborescens AB968398        | C.TGTTT..C      | G.G AGAA.TG.CAC..C.C.GA.AG.CT.G             |    |    |
| O. australis KF937349          | AAAAATAA.C      | ...A...T.A.A.AA ATA.T.TA.CATTTAT            |    |    |
| O. clavata JN943327            | ..G.CGAC.C      | ...GGGGCACCG...GG.C.GA.GG                   |    |    |
| O. coccidiicola AB968404       | ...CTT..C       | G.G AGCA.TG.CAC..C.C.GGA.AG.CT.G            |    |    |
| O. coenomyia AB968396          | AAAA.CA..C      | ...GGACG.C.CGCCC.CCCC.G.G                   |    |    |
| O. communis GU723768           | ..TGTTTT.C      | ...G CA.TG.ATCTGC.A.T.CAAGA.TT..            |    |    |
| C. dipterigena AY245629        | ACAT...GC       | ...A...TTC.G...AAC.GGTTT.C.TG               |    |    |
| C. entomorrhiza AJ786560       | TC..C...A       | ...C.TCCG.AGA.G...G.T..G                    |    |    |
| O. ferruginosa AB968405        | CCT.CAAT.F      | C.G.GGGAAACC...ATA.AA.CGAG                  |    |    |
| O. gracilis HM142942           | G..G...C        | ...GGACAC.CGCCCC.CCG.G                      |    |    |
| O. heteropoda FJ765027         | GCCT.TGCA.C     | ...GGAGAA.TT.C.CC.C.C.GGC.TAATG             |    |    |
| O. irangiensis AY646400        | ATAAAATC.C      | ...A...CTAG.TAA.ATAA.A...T                  |    |    |
| O. lloydii KP200892            | .....           | Noinformation                               |    |    |
| O. longissimi AB968406         | ..CGC..TA       | C..G..A GAT.CC..C.CGTG..A..G                |    |    |
| O. macroacicularis KR005829    | GTTTTTT..C      | G..G AGAA.TG.CAC..C.C.GGA.AG.CT.G           |    |    |
| O. macrocephala MH028143       | ATAT.C.C.TA     | A.ATG.CTCA.A.A.T...T..T                     |    |    |
| O. nigrella JN049853           | CCGC..GA        | TAATCAGAGG.ATC.C.CCGGC.TCG.G                |    |    |
| O. nutans AB176463             | TTTAA.F         | C.G...A...TGAA.A...T.C...TTAA               |    |    |
| O. rhizoidea GU723769          | TTT.C.C         | G..G...CG.CTGGAA.TC...GA.TCCT               |    |    |
| C. robertsii AJ309335          | .GTTTCTT..C     | G..G AGAA.TG.CAC..C.C.GGA.AG.CT.G           |    |    |
| O. rubiginosiperitheciata JN94 | ..TAT...C       | G...TA..TG.CAC..C.C.GGA..G.CT.G             |    |    |
| O. sobolifera AB968409         | A...C..CA       | C..G..GTGCT.CC..CATGCG..A...                |    |    |
| O. sphecocephala JN943350      | AAAA.C          | ...A...CTAG.TAT.A.A.GA.T..                  |    |    |
| O. stylophora JN049828         | ..TTTTTT..C     | G..G AGAA.TG.CAC..C.C.GA.AG.CT.G            |    |    |
| C. tricentri AJ309364          | TAAT.F          | C...C.A...G...ATAA.T.AC...T                 |    |    |
| O. unilateralis GU723756       | TCTT.C          | C...G...CTG...CTGCC...AGGCTCAGC.AC.T        |    |    |
| O. xuefengensis KY429942       | G.TTTCTT..C     | G..G AGA..TG.CAC..C.C.GGA..G.CT.G           |    |    |
| C. tuberculata GQ250005        | G..A...A        | ...TGCTC...A...G.T...                       |    |    |
| C. spegazzinii HQ248195        | .....           | ...T...A...TG.G                             |    |    |
| C. scarabaeicola AY245639      | .....           | A...T...A...A...G.TT.A                      |    |    |
| C. roseostromata AY245637      | .....           | A...A...G.A...T...TG.G                      |    |    |
| C. pseudomilitaris JN943305    | .....           | ...A...G.C.A...AAGA.TT.A                    |    |    |
| C. pleuricapitata JN943304     | ..TA.TCC        | C...T GAT.CCG.C.GG.ATGC..GA.TGA.TC..        |    |    |
| C. cinchukispora AY245642      | .....           | ...C.A...A...A...TG.G                       |    |    |
| C. memorabilis JN116706        | TTT.F           | C...G A.TG.CAC.ATA.C.ATCAAGA.TT..           |    |    |
| C. hawkesii AJ309341           | ..TTTTGT.C      | C...CGGTAT.C.A.ACA.TA.AGAGAAA.ACACGA        |    |    |
| C. gunnii AJ309340             | ..TTTTGT.C      | C...CGGTAT.C.A.ACA.TA.AGAGAAA.ACA.GA        |    |    |
| C. fraticida JQ349068          | TAATCC.C        | ...CATGCAT.CCAGA.T.CA.AA.A.T                |    |    |
| C. cylindrica GU980041         | AT..TGAC        | C...GAGTA...GC.CC.CAGGGGC.CGATG             |    |    |
| C. coccidioperitheciata JN0498 | .....           | ...G...A...A...A...TG.G                     |    |    |
| C. cardinalis KF937320         | .....           | ...GAC.A...A.GA.T...                        |    |    |
| C. brongniartii AB100036       | .....           | F.....A...GTG...A...A...A.TT.A              |    |    |
| C. bifusispora AY245627        | .....           | .....G...CA                                 |    |    |
| I. japonica AF200370           | .....           | .....T...G...A...A...TT..                   |    |    |
| P. hepiali HM135170            | .....           | ...TAAACC.C...A GATACT.AT.AAA.A.TTCA.A      |    |    |
| M. anisopliae AB071711         | .....           |                                             |    |    |



G

|                               |               |             |           |               |                  |
|-------------------------------|---------------|-------------|-----------|---------------|------------------|
|                               | 10            | 20          | 30        | 40            | 50               |
| I. tenuipes_KACC43336         | ACTCCCAAC     | CCTTCTG     | TGAAC     | CTACCCAT      | A GTTGCTCGGGGACC |
| I. cicadae_KACC43335          | .....         | .....       | .....     | .....         | .....            |
| O. sinensis_2-2016-F027       | CTC..A...     | .CC..C...   | .....     | ACAG CA       | .....GA-         |
| C. militaris_KACC43316        | .....         | .....       | .....     | A..T..C       | .....T           |
| C. pruinosa_KACC43329         | CTC..T...     | .C.T.....   | .....     | A..C          | .....T           |
| B. bassiana_KACC43338         | CTC..T...     | .....       | .....     | T..C          | .....T           |
| O. acicularis_JN049820        | CTC..A...     | .CC..C..C   | G...AC.G  | AC            | .....C...GA-     |
| O. agriotidis_AB968403        | CTC..A...     | .CC..C..C   | T...CA    | CDC           | .....C...GA-     |
| O. appendiculata_JN943325     | CTC..G..A     | .CC..C..C   | .....     | CA            | .....C...GA-     |
| O. arborescens_AB968398       | CTC..A...     | .CC..C..C   | T...ACA   | CDC           | .....C...GA-     |
| O. australis_KF937349         | T...T.CTAA    | CCT.....    | T TATA    | T.TTAATT      | .....            |
| O. clavata_JN943327           | CTC..AC...    | .CCG..C...  | CGTGA     | CC.GGAAGC     | .....C...CG.     |
| O. coccidiicola_AB968404      | CTC..A...     | .CC..C..C   | G...ACA   | CAC           | .....C...GA-     |
| O. coenomyia_AB968396         | .....         | GA..CC..C   | .....     | G...CGCGC     | .....C...G.G     |
| O. communis_GU723768          | .....         | .....       | .....     | T...AGCGT     | .....C...T       |
| C. dipterigena_AY245629       | T..C.G..A     | .CCA.....   | A...A..AC | G             | .....C...A.G..   |
| C. entomorrhiza_AJ786560      | .....         | .....       | CAT.A.C   | G.TC          | .....A.T.CA      |
| O. ferruginosa_AB968405       | .....         | .....       | .....     | AG.AA         | .....C.ACTA      |
| O. gracilis_HM142942          | CTC..A..A     | .CC..C..C   | G...CA    | CAGCC         | .....C...TG-     |
| O. heteropoda_FJ765027        | CTC..A..A     | .CA.....    | C T...TCA | .....C...GAA  | .....            |
| O. iranensis_AY646400         | .....         | .....       | .....     | CC A...T..A   | .....            |
| O. lloydii_KP200892           | Noinformation |             |           |               |                  |
| O. longissimi_AB968406        | .....         | GA..CC..... | AT        | A.CACC        | .....C...G-      |
| O. macroacicularis_KR005829   | CTC..A..A     | .CC..C..C   | T...ACA   | CDC           | .....C...GA-     |
| O. myrmecophila_MH028143      | CTCT..G..A    | .C.....     | .....     | T...          | .....C...A.GGG   |
| O. nigrella_JN049853          | .....         | .....       | .....     | CCGC.C.C.C    | .....G...G       |
| O. nutans_AB176463            | .....         | .....       | .....     | T.C.A.TTC     | .....A.TGTA      |
| O. rhizoidea_GU723769         | CTC..A..A     | .ACTG...C   | .....     | GCAAGC        | .....C...GG-     |
| C. robertsii_AJ309335         | CTC..A..A     | .CC.....    | .....     | TCA           | .....C...GA-     |
| O. rubiginosiperithecata_JN94 | .....         | .....       | .....     | CCG..C..C     | .....G...GA-     |
| O. sobolifera_AB968409        | CTC..A..A     | .CC.....    | .....     | T...GCAACC    | .....C...T-      |
| O. sphecocephala_JN943350     | .....         | .....       | .....     | T..A..CA      | .....C...A..     |
| O. stylophora_JN049828        | .....         | .....       | .....     | CC..C..C      | .....C...GG-     |
| C. tracentri_AJ309364         | .....         | .....       | .....     | TCT..C.A      | .....CA..TG      |
| O. unilateralis_GU723756      | CGC..A..A     | .CCAC..A..C | .....     | CGT.GGAAAC    | .....C...G-      |
| O. xuefengensis_KY429942      | CTC..A..A     | .CC..C..C   | A...ACA   | CDC           | .....C...GA-     |
| C. tuberculata_GQ250005       | CTC..A..A     | .....       | .....     | A...G..C      | .....T           |
| C. spgazzinii_HQ248195        | .....         | .....       | .....     | A...T..C      | .....T           |
| C. scarabaeicola_AY245639     | CTC..A..A     | .....       | .....     | T.C           | .....T           |
| C. roseostromata_AY245637     | .....         | .....       | .....     | G...T..C      | .....T           |
| C. pseudomilitaris_JN943305   | CTC..A..A     | .AAA.....   | .....     | A...TC        | .....CA          |
| C. pleuricapitata_JN943304    | .....         | .....       | .....     | A...CC        | .....C           |
| C. ninchukispora_AY245642     | CTC..T..T     | .C.T.....   | .....     | A..C          | .....T           |
| C. memorabilis_JN116706       | .....         | .....       | .....     | A...TT        | .....AC          |
| C. hawkesii_AJ309341          | .....         | .....       | .....     | TT A...T..AC  | .....A..GT.      |
| C. gunnii_AJ309340            | .....         | .....       | .....     | TT A...T..AC  | .....A..GT.      |
| C. fraticida_JQ349068         | .....         | .....       | .....     | CC            | .....TT          |
| C. cylindrica_GU980041        | CTC..A..A     | .CC..AC..C  | G...ACA   | AC            | .....C...GGA     |
| C. coccidioperithecata_JN0498 | .....         | .....       | .....     | CC.TT         | .....A..T..C     |
| C. cardinalis_KF937320        | CTC..A..A     | .AAA.....   | .....     | A...T..C      | .....T           |
| C. brongniartii_AB100036      | CTC..T..T     | .....       | .....     | A...T..T      | .....T           |
| C. bifusispora_AY245627       | .....         | .....       | .....     | A...T..C      | .....T           |
| I. japonica_AF200370          | CTC..A..A     | .T.....     | .....     | A...T..C      | .....T           |
| P. hepiali_HM135170           | .....         | .....       | .....     | TT A...T..AAT | .....GA.         |
| M. anisopliae_AB071711        | .....         | .....       | .....     | TT A...T..AAT | .....GA.         |

H

|                               |                |       |              |                        |                         |
|-------------------------------|----------------|-------|--------------|------------------------|-------------------------|
|                               | 10             | 20    | 30           | 40                     | 50                      |
| I. tenuipes_IT R3             | CTTGGCGGGATTCA | GA    | GCGGCTCACA   | GATACAG                | GTTGGGTGGTC             |
| I. cicadae_KACC43335          | .....          | ..... | .....        | .....                  | .....                   |
| O. sinensis_2-2016-F027       | .....          | ACT   | GAG          | .T.CA..GCG             | .....C.GG..G.CT.G..G    |
| C. militaris_KACC43316        | .....          | ..... | .....        | AAAA..GGT              | .....FG.TT.G..C.        |
| C. pruinosa_KACC43329         | .....          | ..... | .....        | A..A..GCT              | .....A...TT.G..G        |
| B. bassiana_KACC43338         | .....          | ..... | .....        | T...A..AT              | .....GG A...A           |
| O. acicularis_JN049820        | GC.TGTA        | ..... | CCG          | .T..C..G..GT           | .....C..AG.CTTG..G      |
| O. agriotidis_AB968403        | GCC.ACA        | ..... | CG           | T.GT.CA..G.A           | .....GA..AG.CT.G..G     |
| O. appendiculata_JN943325     | T...ACT        | ..... | GAG          | A.T..CA..GCG           | .....C.GGA..AG.C..G..G  |
| O. arborescens_AB968398       | T.G.ACT        | ..... | GAG          | A.T..CA..GCG           | .....C.GA..AG.CT.GT..G  |
| O. australis_KF937349         | A.AAAAAATAA    | ..... | C..A         | ATAA.A.A.AT            | .....ATATAGCA           |
| O. clavata_JN943327           | .....          | ..... | .....        | A.ACTCAG               | .....G...A.CGCT         |
| O. coccidiicola_AB968404      | T.G.ACT        | ..... | GAG          | A.T..CA..GCG           | .....C.GGA..AA.GCC..G   |
| O. coenomyia_AB968396         | AAA..A         | ..... | GACTCAG      | GA..C.GCGCGCCCTCC      | .....C.CGC.GC.GAG..CG   |
| O. communis_GU723768          | .....          | ..... | .....        | ATGCATC                | .....GCA.A...A          |
| C. dipterigena_AY245629       | .....          | ..... | .....        | ACAT                   | .....GC...ATT           |
| C. entomorrhiza_AJ786560      | .....          | ..... | .....        | CAGA                   | .....AGACATC            |
| O. ferruginosa_AB968405       | .....          | ..... | .....        | AATACT                 | .....GAGC               |
| O. gracilis_HM142942          | .....          | ..... | .....        | G.G                    | .....GACTCAG            |
| O. heteropoda_FJ765027        | .....          | ..... | .....        | T.CA                   | .....CAACTCAG           |
| O. iranensis_AY646400         | .....          | ..... | .....        | CAGA                   | .....A.A.AGGTAA         |
| O. lloydii_KP200892           | Noinformation  |       |              |                        |                         |
| O. longissimi_AB968406        | .....          | ..... | .....        | A.ACT                  | .....GAA                |
| O. macroacicularis_KR005829   | T...ACT        | ..... | GAG          | A.T..CA..GCG           | .....C.GGA..AG.CT.G.T.G |
| O. myrmecophila_MH028143      | .....          | ..... | .....        | ATATTCAC               | .....T.AAAT.TC          |
| O. nigrella_JN049853          | .....          | ..... | .....        | CGAATAATCAG            | .....G.TATCGCCCG        |
| O. nutans_AB176463            | .....          | ..... | .....        | TTTTTA                 | .....A.T..GAAA          |
| O. rhizoidea_GU723769         | G..CACT        | ..... | GAG          | .....AC                | .....CTGG               |
| C. robertsii_AJ309335         | .....          | ..... | .....        | ACT                    | .....GAG                |
| O. rubiginosiperithecata_JN94 | TCG.ACT        | ..... | T..T.CA..GCG | .....C.GGA..AG.CT.G..G | .....G.CT.G..G          |
| O. sobolifera_AB968409        | .....          | ..... | .....        | CA.ACT                 | .....GAGT               |
| O. sphecocephala_JN943350     | .....          | ..... | .....        | CAGA                   | .....A.A.AGGTAT         |
| O. stylophora_JN049828        | T...ACT        | ..... | GAG          | A.T..CA..GCG           | .....C.GA..AG.CT.GT..G  |
| C. tracentri_AJ309364         | .....          | ..... | .....        | CA.A                   | .....A.AGG              |
| O. unilateralis_GU723756      | .....          | ..... | .....        | CTTC                   | .....C..G..T..TGCC      |
| O. xuefengensis_KY429942      | .....          | ..... | .....        | ACT                    | .....GAG                |
| C. tuberculata_GQ250005       | .....          | ..... | .....        | G.A                    | .....A.AT               |
| C. spgazzinii_HQ248195        | .....          | ..... | .....        | .....                  | .....ATA                |
| C. scarabaeicola_AY245639     | .....          | ..... | .....        | .....                  | .....A.AT               |
| C. roseostromata_AY245637     | .....          | ..... | .....        | .....                  | .....AAAA               |
| C. pseudomilitaris_JN943305   | .....          | ..... | .....        | .....                  | .....A.A.A              |
| C. pleuricapitata_JN943304    | G.CCACT        | ..... | A            | GAT                    | .....T.C                |
| C. ninchukispora_AY245642     | .....          | ..... | .....        | .....                  | .....A.A                |
| C. memorabilis_JN116706       | .....          | ..... | .....        | TTT                    | .....C..CACT            |
| C. hawkesii_AJ309341          | .....          | ..... | .....        | .....                  | .....CAGACG             |
| C. gunnii_AJ309340            | .....          | ..... | .....        | .....                  | .....CAGACG             |
| C. fraticida_JQ349068         | .....          | ..... | .....        | .....                  | .....CAGA               |
| C. cylindrica_GU980041        | .....          | ..... | .....        | .....                  | .....C.T.A              |
| C. coccidioperithecata_JN0498 | .....          | ..... | .....        | .....                  | .....A.A                |
| C. cardinalis_KF937320        | .....          | ..... | .....        | .....                  | .....A.A.A              |
| C. brongniartii_AB100036      | .....          | ..... | .....        | .....                  | .....T                  |
| C. bifusispora_AY245627       | .....          | ..... | .....        | .....                  | .....A.A                |
| I. japonica_AF200370          | .....          | ..... | .....        | .....                  | .....A..G               |
| P. hepiali_HM135170           | .....          | ..... | .....        | .....                  | .....A.ATA              |
| M. anisopliae_AB071711        | T..TTAAACC     | ..... | C..A         | ATA                    | .....T..TA              |

I

|                                | 10            | 20          | 30               | 40                   |
|--------------------------------|---------------|-------------|------------------|----------------------|
| O. sinensis OS F1              | CATG          | CCTGTCCG    | AGCGTC           | ATCTCAACCCCTCGAGCCCC |
| C. militaris_KACC43316         | .....T.....   | .....T..... | .....CPT.....    | .....                |
| C. pruinosa_KACC43329          | .....T.....   | .....T..... | C.A.ACTCGA.....T | .....                |
| I. cicadae_KACC43335           | .....T.....   | .....T..... | .....CPT.....    | .....                |
| I. tenuipes_KACC43336          | .....T.....   | .....T..... | .....CPT.....    | .....                |
| B. bassiana_KACC43338          | .....T.....   | .....T..... | .....C.T.....    | .....                |
| O. acicularis_JN049820         | .....T.....   | .....T..... | .....A.....      | .....                |
| O. agriotidis_AB968403         | .....T.....   | .....T..... | .....G.....      | .....                |
| O. appendiculata_JN943325      | .....T.....   | .....A..... | .....            | .....                |
| O. arborescens_AB968398        | .....T.....   | .....T..... | .....G.....      | .....                |
| O. australis_KF937349          | .....T.....   | T.T         | TACTATA          | TTAA                 |
| O. clavata_JN943327            | .....T.....   | GC.C.C.G    | ACTCG            | G.G.                 |
| O. coccidiicola_AB968404       | .....T.....   | AT.TC       | CTCGAG           | .....                |
| O. coenomyia_AB968396          | .....G.T..... | .....G..... | .....            | .....                |
| O. communis_GU723768           | .....T.....   | .....T..... | .....C.....      | GT.....              |
| C. dipterigena_AY245629        | .....T.....   | .....T..... | .....CTT.....    | AG.....              |
| C. entomorrhiza_AJ786560       | .....T.....   | G.A.G       | .....G.....      | .....                |
| O. ferruginosa_AB968405        | .....A.....   | T           | TC               | CTC                  |
| O. gracilis_HM142942           | .....T.....   | .....T..... | .....G.....      | .....                |
| O. heteropoda_FJ765027         | .....T.....   | .....T..... | .....            | .....                |
| O. iranagensis_AY646400        | .....A.....   | T.AC.G      | ACTA             | AGA                  |
| O. lloydii_KP200892            | .....T.....   | CTAGT       | GCT              | C.F                  |
| O. longissimi_AB968406         | .....T.....   | TATC.T      | CTCGAG           | .....G               |
| O. macroacicularis_KR005829    | .....T.....   | .....T..... | .....            | .....                |
| O. myrmecophila_MH028143       | .....T.....   | AC          | TACTAGA          | AG                   |
| O. nigrella_JN049853           | .....T.....   | CGCAG       | G                | CTCGAG               |
| O. nutans_AB176463             | A.TT          | .....T..... | G.A.TT           | T                    |
| O. rhizoidea_GU723769          | .....G.....   | .....T..... | .....            | .....                |
| C. robertsii_AJ309335          | .....T.....   | .....T..... | .....            | .....                |
| O. rubiginosiperitheciata_JN94 | .....T.....   | .....T..... | .....            | .....                |
| O. sobolifera_AB968409         | .....T.....   | TGTC.T      | CTCGAG           | .....G               |
| O. sphecocephala_JN943350      | A.T           | T.AC        | GTACTAGAGG       | TG                   |
| O. stylophora_JN049828         | .....T.....   | .....T..... | .....            | .....                |
| C. tricentri_AJ309364          | .....T.....   | T.AC        | GTACTA           | AGA                  |
| O. unilateralis_GU723756       | C             | ATGC        | CAC              | CTCG                 |
| O. xuefengensis_KY429942       | .....T.....   | .....T..... | .....            | .....                |
| C. tuberculata_GQ250005        | .....A.....   | .....A..... | .....C.....      | .....                |
| C. spgazzinii_HQ248195         | .....T.....   | .....T..... | .....CPT.....    | .....                |
| C. scarabaeicola_AY245639      | .....T.....   | .....T..... | .....CPT.....    | .....                |
| C. roseostromata_AY245637      | .....T.....   | .....T..... | .....CPT.....    | .....                |
| C. pseudomilitaris_JN943305    | .....T.....   | .....T..... | .....T.....      | .....                |
| C. pleuricapitata_JN943304     | .....T.....   | G.C.A       | CTC              | G                    |
| C. ninchukispora_AY245642      | .....T.....   | T.C.A       | CTCGA            | T                    |
| C. memorabilis_JN116706        | .....T.....   | T.C.A       | CTCGT            | .....                |
| C. hawkesii_AJ309341           | .....T.....   | T           | AG               | A                    |
| C. gunnii_AJ309340             | .....T.....   | .....T..... | AG               | FA                   |
| C. fraticida_JQ349068          | .....T.....   | .....T..... | .....A.....      | .....                |
| C. cylindrica_GU980041         | .....T.....   | .....T..... | .....G.....      | .....                |
| C. coccidioperitheciata_JN0498 | .....T.....   | .....T..... | .....C.T.....    | .....                |
| C. cardinalis_KF937320         | .....T.....   | .....T..... | .....T.....      | .....                |
| C. brongniartii_AB100036       | .....T.....   | .....T..... | .....C.T         | T                    |
| C. bifusispora_AY245627        | .....T.....   | .....T..... | .....CPT.....    | .....                |
| I. japonica_AF200370           | .....T.....   | .....T..... | .....CPT.....    | .....                |
| P. hepiali_HM135170            | .....T.....   | .....T..... | .....CPT.....    | .....                |
| M. anisopliae_AB071711         | .....T.....   | TA.GC       | .....A.....      | .....                |

J

|                                | 10                 | 20               | 30             | 40           |
|--------------------------------|--------------------|------------------|----------------|--------------|
| O. sinensis OS R2              | CCTAC              | TGATCCGAGG       | TCAAC          | TGGAG        |
| C. militaris_KACC43316         | .....G.TC.....     | .....AGT.....    | .....GC.....   | .....        |
| C. pruinosa_KACC43329          | .....G.TC.....     | .....AA.....     | .....T.....    | .....GT..... |
| I. cicadae_KACC43335           | .....G.TC.....     | .....GA.....     | .....GT.....   | .....G.....  |
| I. tenuipes_KACC43336          | .....G.TC.....     | .....GA.....     | .....GT.....   | .....G.....  |
| B. bassiana_KACC43338          | .....T.....        | .....G.TC.....   | .....AA.....   | .....T.....  |
| O. acicularis_JN049820         | .....TCTTGA.....   | .....G.....      | .....C.....    | .....        |
| O. agriotidis_AB968403         | .....TCT.TGA.....  | .....CT.....     | .....G.....    | .....C.....  |
| O. appendiculata_JN943325      | .....TCTG.....     | .....TC.....     | .....TG.....   | .....        |
| O. arborescens_AB968398        | .....TCC.....      | .....GA.....     | .....GAGA..... | .....T.....  |
| O. australis_KF937349          | .....T.....        | T.AC             | TATAAT         | .....        |
| O. clavata_JN943327            | .....G.....        | GGT.C            | .....TG.....   | .....        |
| O. coccidiicola_AB968404       | .....CTTGA.....    | .....A.G.C.....  | .....          | .....        |
| O. coenomyia_AB968396          | .....G.....        | C.....           | TCCAC          | CG.G.....    |
| O. communis_GU723768           | .....T.....        | CTGAA            | AGT            | GC           |
| C. dipterigena_AY245629        | .....C.TA.....     | AAAAT            | GT             | .....        |
| C. entomorrhiza_AJ786560       | .....G.C.TAGA..... | .....GTG.....    | .....GC.....   | .....        |
| O. ferruginosa_AB968405        | .....TCTA.....     | .....G.....      | .....          | .....        |
| O. gracilis_HM142942           | .....G.GG.CA.....  | .....CT.CAC..... | .....G.....    | .....        |
| O. heteropoda_FJ765027         | .....TCTA.....     | .....AAAGT.....  | .....GC.....   | .....        |
| O. iranagensis_AY646400        | .....A.....        | TA               | ACTAGAAA       | .....        |
| O. lloydii_KP200892            | .....G.....        | G.....           | GC.TCA         | FGC.C.C.C    |
| O. longissimi_AB968406         | .....CAC.....      | AA               | CG.C.C.C       | .....        |
| O. macroacicularis_KR005829    | .....T.CC.....     | GA               | GAG            | TC           |
| O. myrmecophila_MH028143       | .....T.....        | AC               | TA             | GT           |
| O. nigrella_JN049853           | Noninformation     |                  |                |              |
| O. nutans_AB176463             | TAT                | T.T              | TGT            | TA.AA        |
| O. rhizoidea_GU723769          | .....TC.TG.....    | .....TT.C.....   | .....          | .....        |
| C. robertsii_AJ309335          | .....TCCC.....     | GA               | GAG            | T            |
| O. rubiginosiperitheciata_JN94 | .....C.TTG.....    | .....GA.....     | .....          | .....        |
| O. sobolifera_AB968409         | .....CAC.....      | AAA              | FG.C.G         | .....        |
| O. sphecocephala_JN943350      | .....TA.....       | AT               | GAA            | .....        |
| O. stylophora_JN049828         | .....C.TG.....     | .....A.G.....    | .....          | .....        |
| C. tricentri_AJ309364          | .....TA.AG.....    | T                | TTA            | G            |
| O. unilateralis_GU723756       | .....C.CT.....     | P.A.C            | C.C.C          | .....        |
| O. xuefengensis_KY429942       | .....T.CC.....     | GA               | GAG            | T.T          |
| C. tuberculata_GQ250005        | .....G.G.TC.....   | TA               | GT             | G.T          |
| C. spgazzinii_HQ248195         | .....G.TCT.....    | GA               | T              | .....        |
| C. scarabaeicola_AY245639      | .....T.....        | G.TC             | AA             | T            |
| C. roseostromata_AY245637      | .....G.TC.....     | AA               | AGT            | GT           |
| C. pseudomilitaris_JN943305    | .....G.TC.....     | AA               | AGT            | GT           |
| C. pleuricapitata_JN943304     | .....T.....        | CGAA             | TT             | C            |
| C. ninchukispora_AY245642      | .....G.TC.....     | AA               | T              | GT           |
| C. memorabilis_JN116706        | .....T.....        | CA.A             | A              | AGT          |
| C. hawkesii_AJ309341           | .....TT.....       | TCTAGAA          | AGAA           | A.T          |
| C. gunnii_AJ309340             | .....T.....        | TCTAGAA          | AGAA           | A.T          |
| C. fraticida_JQ349068          | .....T.....        | TCTT             | GATAGT         | GC           |
| C. cylindrica_GU980041         | .....TCTAC.....    | GA               | TT.A           | CGTT         |
| C. coccidioperitheciata_JN0498 | .....T.....        | G.TCG            | AA             | GT           |
| C. cardinalis_KF937320         | .....G.TC.....     | AA               | GT             | GT           |
| C. brongniartii_AB100036       | .....T.....        | G.TC             | AA             | T            |
| C. bifusispora_AY245627        | .....G.TC.....     | GA               | GT             | G            |
| I. japonica_AF200370           | .....G.TC.....     | GA               | GT             | G            |
| P. hepiali_HM135170            | .....G.TC.....     | GA               | GT             | G            |
| M. anisopliae_AB071711         | .....TATA.....     | AA               | AGT            | G            |

**Figure S4.** Confirmation of primer specificity by the alignment of specie-specific SCAR primer regions used for both conventional and real-time PCR assay. **(A)** Primer CM F3, **(B)** Primer CM R3, **(C)** Primer CP F1, **(D)** Primer CP R1, **(E)** Primer IC F3, **(F)** Primer IC R3, **(G)** Primer IT F4, **(H)** Primer IT R3, **(I)** Primer OS F1, and **(J)** Primer OS R2. The boxes indicate primer sequences. Dots (.) and dashes (-) indicate identical nucleotides and gaps, respectively, when compared with corresponding primer region, to maximize sequence alignment presentation.
